# Supplementary material for: Cigarette smoke increases susceptibility to infection in lung epithelial cells by upregulating caveolin-dependent endocytosis
Source: PubMed Central journal article supplement (PMC7241776; doi:10.1371/journal.pone.0232102), 2020-05-21
Supplement: pone.0232102.s001.pdf [file pone.0232102.s001.pdf]

Cav 1 1:1K  
Ext. P<sub>135</sub> 1:10K  
2 films 5 sec

2522 3

Immediate      6 h post exposure

Air    Smoke      Air      Smoke

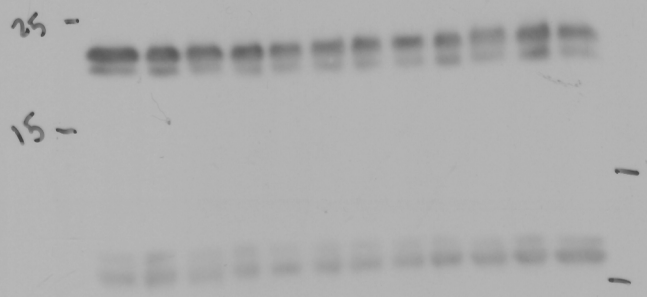

Caveolin-1 (21, 24kDa)

2522 3

Cav 1  
2 films  
1 sec

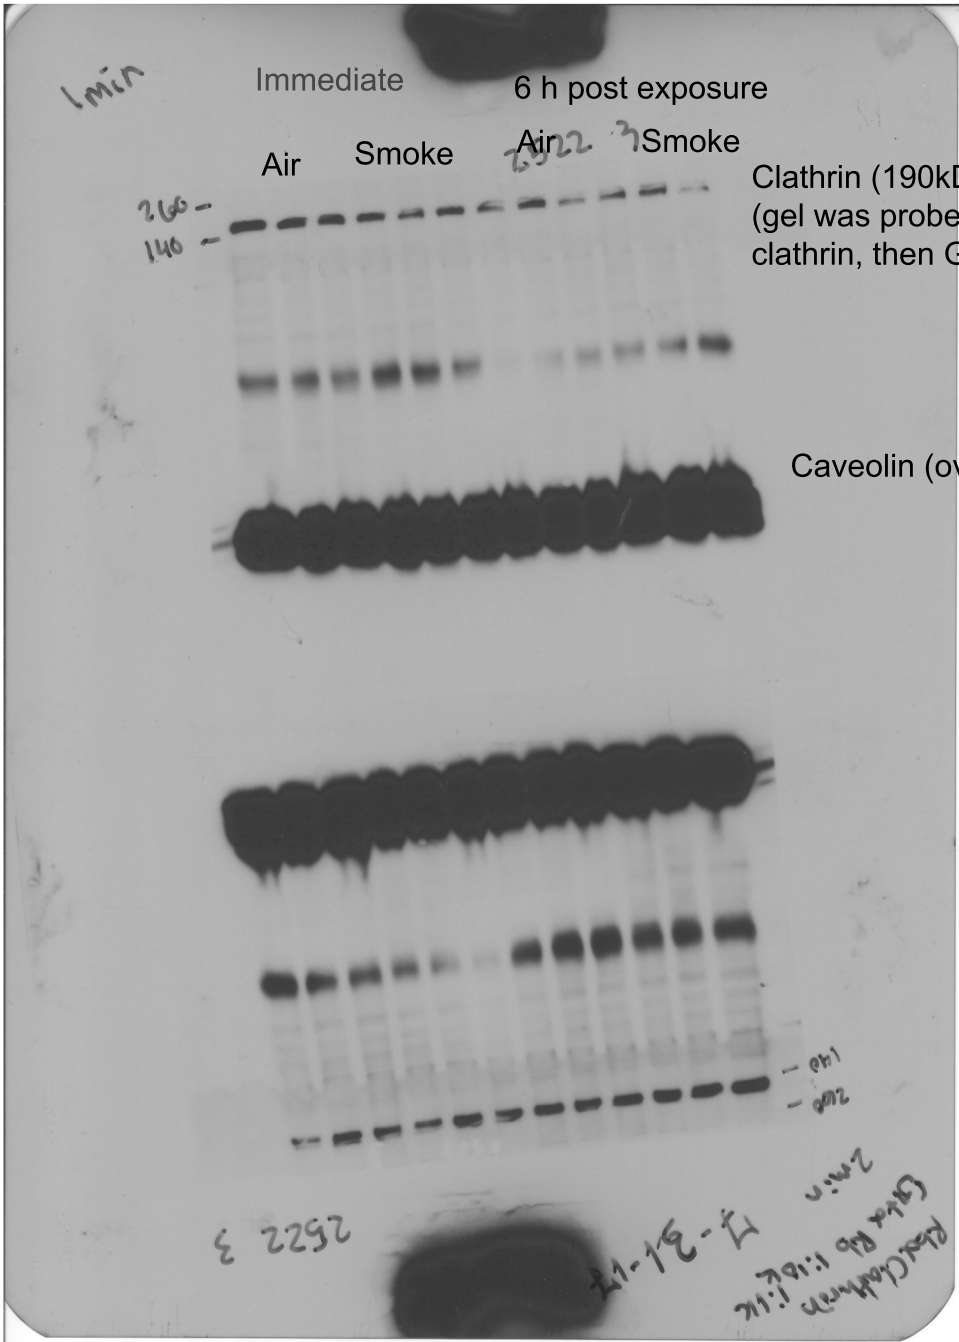

Same blot longer exposure

GAPDH  
 1:40K  
 Cytosol 1:10K  
 2. Air/MS  
 10sec  
 8-2-17

2522 5

35 -

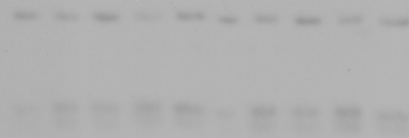

2522 4

35 -

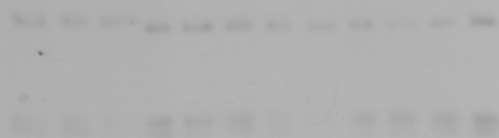

2522 3

|  |           |       |                   |       |
|--|-----------|-------|-------------------|-------|
|  | Immediate |       | 6 h post exposure |       |
|  | Air       | Smoke | Air               | Smoke |

GAPDH (36kDa) 35 -

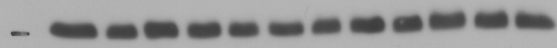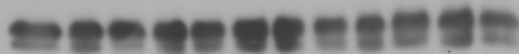

Caveolin  
 (gel was probed for caveolin first,  
 then clathrin, then GAPDH, without stripping.  
 Clathrin does not appear on this very short  
 exposure.)
